# Supplementary material for: Peptides derived from the dependence receptor ALK are proapoptotic for ALK-positive tumors
Source: PubMed Central journal article supplement (PMC4669685; doi:10.1038/cddis.2015.102), 2015-05-07
Supplement: cddis2015102x1.pdf [file cddis2015102x1.pdf]

## **SUPPLEMENTARY INFORMATION**

### **Legends**

#### **Supplementary Figure 1**

Immunofluorescence detection of ALK in SKN-AS neuroblastoma cells transfected with control vector (neo), ALK<sup>wt</sup> or ALK-F1174L mutant cDNA using ZAL4 anti-ALK antibody followed by a FITC-coupled anti-rabbit Ig antibody. Note a cytoplasmic localization in both wt and mutant ALK-expressing cells, with a particular reinforcement at the membrane in ALK<sup>wt</sup>-transfected cells.

#### **Supplementary Figure 2**

Evidence of intracellular penetration of myristylated P36 and P12-3 peptides in SH-SY5Y neuroblastoma and Cost ALCL tumor cells. Cells were incubated for 1 h at 37°C with biotin-coupled, myristylated P36 (P36-myr-biot) or P12-3 (P12-3-myr-biot) peptides, then fixed, permeabilized and stained with streptavidin-FITC, as indicated. The peptides (in green) localize in the cytoplasm, especially close to the plasma membrane and in structures resembling the Golgi apparatus.

### **Supplementary Tables**

**Table S1:** List of P36-interacting proteins from the Cost ALCL cell line

**Table S2:** List of P36-interacting proteins from the SH-SY5Y neuroblastoma cell line
