# Supplementary material for: Peptides derived from the dependence receptor ALK are proapoptotic for ALK-positive tumors
Source: PubMed Central journal article supplement (PMC4669685; doi:10.1038/cddis.2015.102), 2015-05-07

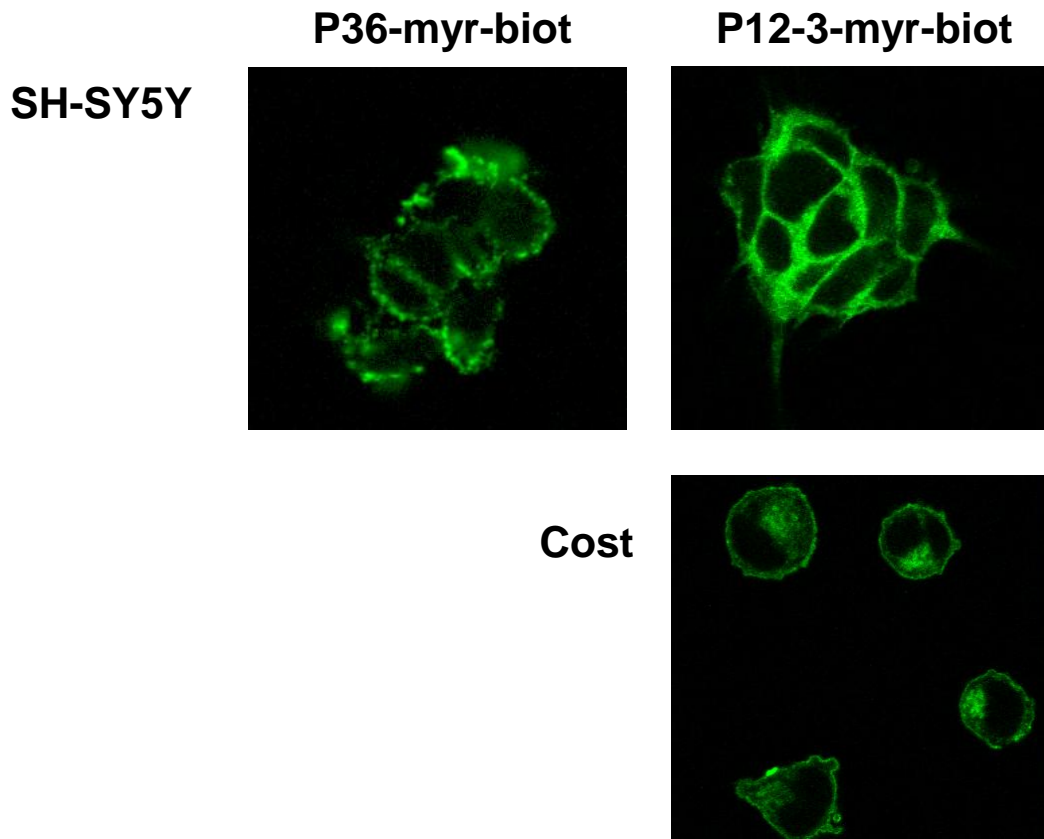

Supplement: cddis2015102x3.pdf [file cddis2015102x3.pdf]
