# Supplementary material for: Peptides derived from the dependence receptor ALK are proapoptotic for ALK-positive tumors
Source: PubMed Central journal article supplement (PMC4669685; doi:10.1038/cddis.2015.102), 2015-05-07
Supplement: cddis2015102x5.pdf [file cddis2015102x5.pdf]

**Table S2 : List of P36-interacting proteins from the SH-SY5Y neuroblastoma cell line**

| Hit | ID          | Description                                                      | Score  | MW     | Peptides |
|-----|-------------|------------------------------------------------------------------|--------|--------|----------|
| 1   | IPI00644712 | XRCC6 X-ray repair cross-complementing protein 6 (Ku70)          | 683,26 | 69799  | 29       |
| 2   | IPI00414676 | HSP90AB1 Heat shock protein HSP 90-beta                          | 604,36 | 83212  | 25       |
| 3   | IPI00784154 | HSPD1 60 kDa heat shock protein, mitochondrial                   | 825,1  | 61016  | 25       |
| 4   | IPI00021439 | ACTB Actin, cytoplasmic 1                                        | 508,6  | 41710  | 25       |
| 5   | IPI00418471 | VIM Vimentin                                                     | 461,23 | 53619  | 26       |
| 6   | IPI00011107 | IDH2 Isocitrate dehydrogenase [NADP], mitochondrial              | 421,91 | 50877  | 23       |
| 7   | IPI00302927 | CCT4;ILK-2 T-complex protein 1 subunit delta                     | 634,16 | 57888  | 23       |
| 8   | IPI00027626 | CCT6A T-complex protein 1 subunit zeta                           | 274,37 | 57988  | 24       |
| 9   | IPI00855912 | PUF60 Isoform 6 of Poly(U)-binding-splicing factor PUF60         | 573,96 | 55364  | 24       |
| 10  | IPI00396485 | EEF1A1 Elongation factor 1-alpha 1                               | 318,22 | 50109  | 18       |
| 11  | IPI00021428 | ACTA1 Actin, alpha skeletal muscle                               | 305,18 | 42024  | 20       |
| 12  | IPI00003865 | HSPA8 Isoform 1 of Heat shock cognate 71 kDa protein             | 472,34 | 70854  | 24       |
| 13  | IPI00007752 | TUBB2C Tubulin beta-2C chain                                     | 381,44 | 49799  | 17       |
| 14  | IPI00220834 | XRCC5 X-ray repair cross-complementing protein 5 (Ku80)          | 269,6  | 82652  | 21       |
| 15  | IPI00013683 | TUBB3 Tubulin beta-3 chain                                       | 479,89 | 50400  | 18       |
| 16  | IPI00013475 | TUBB2A Tubulin beta-2A chain                                     | 372,99 | 49875  | 15       |
| 17  | IPI00645452 | TUBB Tubulin, beta                                               | 299,59 | 47736  | 16       |
| 18  | IPI00054042 | GTF2I Isoform 1 of General transcription factor II-I             | 435,39 | 112346 | 16       |
| 19  | IPI00180675 | TUBA1A Tubulin alpha-1A chain                                    | 347,16 | 50104  | 16       |
| 20  | IPI00883857 | HNRNPU Isoform Long of Heterogeneous nuclear ribonucleoprotein U | 176,35 | 90528  | 20       |
| 21  | IPI00018465 | CCT7 T-complex protein 1 subunit eta                             | 307,21 | 59329  | 16       |
| 22  | IPI00382470 | HSP90AA1 Isoform 2 of Heat shock protein HSP 90-alpha            | 274,16 | 98099  | 17       |
| 23  | IPI00479186 | PKM2 Isoform M2 of Pyruvate kinase isozymes M1/M2                | 372,32 | 57900  | 17       |
| 24  | IPI00022744 | CSE1L Isoform 1 of Exportin-2                                    | 361,08 | 110346 | 18       |
| 25  | IPI00290770 | CCT3 T-complex protein 1 subunit gamma isoform b                 | 265,91 | 60424  | 17       |
| 26  | IPI00646917 | NUDT21 Cleavage and polyadenylation specificity factor subunit 5 | 283,73 | 26211  | 15       |
| 27  | IPI00008438 | RPS10 40S ribosomal protein S10                                  | 167,76 | 18886  | 14       |
| 28  | IPI00014424 | EEF1A2 Elongation factor 1-alpha 2                               | 161,74 | 50438  | 9        |
| 29  | IPI00221222 | SUB1 Activated RNA polymerase II transcriptional coactivator p15 | 209,62 | 14386  | 10       |
| 30  | IPI00171903 | HNRNPM Isoform 1 of Heterogeneous nuclear ribonucleoprotein M    | 121,34 | 77464  | 15       |
| 31  | IPI00008433 | RPS5 40S ribosomal protein S5                                    | 148,29 | 22862  | 11       |
| 32  | IPI00215780 | RPS19 40S ribosomal protein S19                                  | 146,43 | 16051  | 12       |

|    |             |                                                                                         |        |       |    |
|----|-------------|-----------------------------------------------------------------------------------------|--------|-------|----|
| 33 | IPI00304435 | NIPSNAP1 Protein NipSnap homolog 1                                                      | 143,92 | 33289 | 13 |
| 34 | IPI00645948 | HMGB1 High-mobility group box 1                                                         | 138,18 | 25797 | 10 |
| 35 | IPI00011253 | RPS3 40S ribosomal protein S3                                                           | 100,01 | 26671 | 13 |
| 36 | IPI00029744 | SSBP1 Single-stranded DNA-binding protein, mitochondrial                                | 209,04 | 17249 | 10 |
| 37 | IPI00012998 | MIR1279;CPSF6 Isoform 1 of Cleavage and polyadenylation specificity factor subunit 6    | 205,66 | 59173 | 9  |
| 38 | IPI00013415 | RPS7 40S ribosomal protein S7                                                           | 109,16 | 22113 | 11 |
| 39 | IPI00219483 | SNRNP70 Isoform 2 of U1 small nuclear ribonucleoprotein 70 kDa                          | 96,21  | 50587 | 12 |
| 40 | IPI00020127 | RPA1 Replication protein A 70 kDa DNA-binding subunit                                   | 247,82 | 68095 | 9  |
| 41 | IPI00027107 | TUFM Tu translation elongation factor, mitochondrial precursor                          | 241,55 | 49843 | 10 |
| 42 | IPI00215914 | ARF1 ADP-ribosylation factor 1                                                          | 183,99 | 20684 | 9  |
| 43 | IPI00410693 | SERBP1 SERPINE1 mRNA binding protein 1, isoform CRA_d                                   | 158,12 | 50890 | 10 |
| 44 | IPI00018350 | MCM5 DNA replication licensing factor MCM5                                              | 134,17 | 82233 | 10 |
| 45 | IPI00017963 | SNRPD2 Small nuclear ribonucleoprotein Sm D2                                            | 207,94 | 13518 | 7  |
| 46 | IPI00302925 | CCT8 59 kDa protein                                                                     | 192,35 | 59440 | 9  |
| 47 | IPI00440493 | ATP5A1 ATP synthase subunit alpha, mitochondrial                                        | 191,08 | 59714 | 9  |
| 48 | IPI00221093 | RPS17 40S ribosomal protein S17                                                         | 168,16 | 15540 | 7  |
| 49 | IPI00479058 | RPS15 40S ribosomal protein S15                                                         | 111,23 | 17029 | 6  |
| 50 | IPI00376798 | RPL11 Isoform 1 of 60S ribosomal protein L11                                            | 93,69  | 20240 | 9  |
| 51 | IPI00023530 | CDK5 Cell division protein kinase 5                                                     | 88,31  | 33283 | 10 |
| 52 | IPI00374054 | ENAH Isoform 2 of Protein enabled homolog                                               | 76,75  | 63886 | 8  |
| 53 | IPI00221354 | FUS Isoform Short of RNA-binding protein FUS                                            | 198    | 53323 | 7  |
| 54 | IPI00031556 | U2AF2 Isoform 1 of Splicing factor U2AF 65 kDa subunit                                  | 136,35 | 53467 | 8  |
| 55 | IPI00028031 | ACADVL cDNA FLJ56425, highly similar to Very-long-chain specific acyl-CoA dehydrogenase | 245,83 | 75162 | 8  |
| 56 | IPI00607708 | LDHA Isoform 2 of L-lactate dehydrogenase A chain                                       | 136,3  | 36457 | 7  |
| 57 | IPI00015911 | DLD Dihydrolipoyl dehydrogenase, mitochondrial                                          | 118,31 | 54143 | 7  |
| 58 | IPI00465248 | ENO1 Isoform alpha-enolase of Alpha-enolase                                             | 108,17 | 47139 | 7  |
| 59 | IPI00020436 | RAB11B Ras-related protein Rab-11B                                                      | 107,66 | 24473 | 6  |
| 60 | IPI00290566 | TCP1 T-complex protein 1 subunit alpha                                                  | 76,22  | 60306 | 8  |
| 61 | IPI00299904 | MCM7 Isoform 1 of DNA replication licensing factor MCM7                                 | 168,77 | 81257 | 7  |
| 62 | IPI00215918 | ARF4 ADP-ribosylation factor 4                                                          | 152,25 | 20498 | 7  |
| 63 | IPI00003362 | HSPA5 HSPA5 protein                                                                     | 141,38 | 72377 | 7  |
| 64 | IPI00004416 | CHMP2A Charged multivesicular body protein 2a                                           | 138,77 | 25088 | 6  |
| 65 | IPI00297779 | CCT2 T-complex protein 1 subunit beta                                                   | 117,62 | 57452 | 6  |
| 66 | IPI00013881 | HNRNPH1 Heterogeneous nuclear ribonucleoprotein H                                       | 101,61 | 49198 | 7  |
| 67 | IPI00643920 | TKT cDNA FLJ54957, highly similar to Transketolase                                      | 100,01 | 68698 | 6  |
| 68 | IPI00010720 | CCT5 T-complex protein 1 subunit epsilon                                                | 87,93  | 59633 | 6  |

|     |             |                                                                                        |        |        |   |
|-----|-------------|----------------------------------------------------------------------------------------|--------|--------|---|
| 69  | IPI00438229 | TRIM28 Isoform 1 of Transcription intermediary factor 1-beta                           | 81,47  | 88493  | 7 |
| 70  | IPI00018146 | YWHAQ 14-3-3 protein theta                                                             | 77,99  | 27747  | 6 |
| 71  | IPI00219097 | HMGB2 High mobility group protein B2                                                   | 55,33  | 24019  | 6 |
| 72  | IPI00186290 | EEF2 Elongation factor 2                                                               | 51,05  | 95277  | 7 |
| 73  | IPI00935624 | LOC100293829 similar to hCG2040565                                                     | 49,28  | 13902  | 5 |
| 74  | IPI00215965 | HNRNPA1 Isoform A1-B of Heterogeneous nuclear ribonucleoprotein A1                     | 191,46 | 38723  | 6 |
| 75  | IPI00005978 | SFRS2 Splicing factor, arginine/serine-rich 2                                          | 135,01 | 25461  | 4 |
| 76  | IPI00398625 | HRNR Hornerin                                                                          | 123,81 | 282228 | 3 |
| 77  | IPI00008964 | RAB1B Ras-related protein Rab-1B                                                       | 105,37 | 22157  | 5 |
| 78  | IPI00396378 | HNRNPA2B1 Isoform B1 of Heterogeneous nuclear ribonucleoproteins A2/B1                 | 81,9   | 37407  | 6 |
| 79  | IPI00012493 | RPS20 40S ribosomal protein S20                                                        | 70,98  | 13364  | 4 |
| 80  | IPI00166874 | DDX39 DEAD (Asp-Glu-Ala-Asp) box polypeptide 39, isoform CRA_c                         | 69,35  | 36553  | 4 |
| 81  | IPI00027285 | SNRPB Isoform SM-B' of Small nuclear ribonucleoprotein-associated proteins B and B'    | 60     | 24594  | 4 |
| 82  | IPI00016077 | GBAS Protein NipSnap homolog 2                                                         | 51,69  | 33721  | 6 |
| 83  | IPI00012382 | SNRPA U1 small nuclear ribonucleoprotein A                                             | 47,41  | 31259  | 5 |
| 84  | IPI00419585 | PPIA Peptidyl-prolyl cis-trans isomerase A                                             | 41,35  | 18001  | 6 |
| 85  | IPI00029267 | SNRPB2 U2 small nuclear ribonucleoprotein B''                                          | 36     | 25470  | 5 |
| 86  | IPI00027462 | S100A9 Protein S100-A9                                                                 | 152,2  | 13234  | 4 |
| 87  | IPI00006034 | CRIP2 Cysteine-rich protein 2                                                          | 149,62 | 22478  | 4 |
| 88  | IPI00940786 | MCM3 DNA replication licensing factor MCM3                                             | 139,75 | 90924  | 3 |
| 89  | IPI00550821 | CPSF7 Isoform 1 of Cleavage and polyadenylation specificity factor subunit 7           | 130,47 | 52018  | 5 |
| 90  | IPI00215919 | ARF5 ADP-ribosylation factor 5                                                         | 122,76 | 20517  | 5 |
| 91  | IPI00328840 | THOC4 THO complex subunit 4                                                            | 104,95 | 27541  | 5 |
| 92  | IPI00257508 | DPYSL2 Dihydropyrimidinase-related protein 2                                           | 94,85  | 62255  | 5 |
| 93  | IPI00017617 | DDX5 Probable ATP-dependent RNA helicase DDX5                                          | 94,28  | 69105  | 5 |
| 94  | IPI00011307 | MTHFD2 Bifunctional methylenetetrahydrofolate dehydrogenase/cyclohydrolase, mitochondr | 94,15  | 37871  | 4 |
| 95  | IPI00027350 | PRDX2 Peroxiredoxin-2                                                                  | 81,15  | 21878  | 4 |
| 96  | IPI00298547 | PARK7 Protein DJ-1                                                                     | 72,77  | 19878  | 3 |
| 97  | IPI00016339 | RAB5C Ras-related protein Rab-5C                                                       | 69,4   | 23468  | 5 |
| 98  | IPI00013468 | BUB3 Isoform 1 of Mitotic checkpoint protein BUB3                                      | 68,14  | 37131  | 5 |
| 99  | IPI00019848 | HCFC1 Isoform 1 of Host cell factor 1                                                  | 67,22  | 208602 | 5 |
| 100 | IPI00215920 | ARF6 ADP-ribosylation factor 6                                                         | 66,28  | 20069  | 5 |
| 101 | IPI00643041 | RANP1;RAN GTP-binding nuclear protein Ran                                              | 61,26  | 24408  | 5 |
| 102 | IPI00000494 | RPL5;SNORD21 60S ribosomal protein L5                                                  | 54,5   | 34341  | 5 |
| 103 | IPI00024933 | RPL12 Isoform 1 of 60S ribosomal protein L12                                           | 53,6   | 17808  | 5 |
| 104 | IPI00479997 | STMN1 Stathmin                                                                         | 50,14  | 17292  | 5 |

|     |             |                                                                                 |        |        |   |
|-----|-------------|---------------------------------------------------------------------------------|--------|--------|---|
| 105 | IPI00031820 | FARSA Phenylalanyl-tRNA synthetase alpha chain                                  | 43,34  | 57528  | 4 |
| 106 | IPI00903251 | - 14 kDa protein                                                                | 42,29  | 13606  | 5 |
| 107 | IPI00001639 | KPNB1 Importin subunit beta-1                                                   | 153,89 | 97108  | 3 |
| 108 | IPI00026272 | HIST1H2AE;HIST1H2AB;HIST1H2AD;HIST1H2AL;HIST1H2AM;HIST1H2AI;HIST1H2A            | 134,06 | 14127  | 3 |
| 109 | IPI00909841 | - cDNA FLJ51435, moderately similar to Cofilin-1                                | 133,63 | 12451  | 4 |
| 110 | IPI00291928 | RAB14 Ras-related protein Rab-14                                                | 120,74 | 23882  | 3 |
| 111 | IPI00011913 | HNRNPA0 Heterogeneous nuclear ribonucleoprotein A0                              | 118,26 | 30822  | 4 |
| 112 | IPI00304692 | RBMX Heterogeneous nuclear ribonucleoprotein G                                  | 92,76  | 42306  | 4 |
| 113 | IPI00005613 | U2AF1 Splicing factor U2AF 35 kDa subunit                                       | 82     | 27854  | 4 |
| 114 | IPI00029019 | UBAP2L Isoform 2 of Ubiquitin-associated protein 2-like                         | 80,24  | 103867 | 4 |
| 115 | IPI00026271 | RPS14 40S ribosomal protein S14                                                 | 78,9   | 16263  | 2 |
| 116 | IPI00219018 | GAPDH Glyceraldehyde-3-phosphate dehydrogenase                                  | 75,9   | 36030  | 4 |
| 117 | IPI00848226 | GNB2L1 Guanine nucleotide-binding protein subunit beta-2-like 1                 | 73,25  | 35055  | 4 |
| 118 | IPI00182289 | RPS29 40S ribosomal protein S29                                                 | 72,25  | 6672   | 3 |
| 119 | IPI00419880 | RPS3A 40S ribosomal protein S3a                                                 | 67,23  | 29926  | 3 |
| 120 | IPI00009841 | EWSR1 Ewing sarcoma breakpoint region 1 isoform 1                               | 62,38  | 68923  | 4 |
| 121 | IPI00449049 | PARP1 Poly [ADP-ribose] polymerase 1                                            | 60,18  | 113012 | 4 |
| 122 | IPI00010271 | RAC1 Isoform A of Ras-related C3 botulinum toxin substrate 1                    | 58,16  | 21436  | 3 |
| 123 | IPI00329625 | SNORA5B;TBRG4 cDNA FLJ56153, highly similar to Homo sapiens transforming growth | 54,26  | 71812  | 3 |
| 124 | IPI00009822 | SRP54 Signal recognition particle 54 kDa protein                                | 49,28  | 55668  | 4 |
| 125 | IPI00017297 | MATR3 Matrin-3                                                                  | 46,1   | 94565  | 4 |
| 126 | IPI00872762 | SUCLG1 Succinyl-CoA ligase [GDP-forming] subunit alpha, mitochondrial           | 43,28  | 36227  | 4 |
| 127 | IPI00000874 | PRDX1 Peroxiredoxin-1                                                           | 35,51  | 22096  | 4 |
| 128 | IPI00411639 | RPSAP15;SNORA6;SNORA62;RPSA Laminin receptor-like protein LAMRL5                | 154,98 | 32975  | 3 |
| 129 | IPI00031812 | YBX1 Nuclease-sensitive element-binding protein 1                               | 101,25 | 35903  | 2 |
| 130 | IPI00163505 | RBM39 Isoform 1 of RNA-binding protein 39                                       | 94,73  | 59343  | 2 |
| 131 | IPI00007765 | HSPA9 Stress-70 protein, mitochondrial                                          | 92,4   | 73635  | 3 |
| 132 | IPI00006932 | LUC7L2 cDNA FLJ55988, highly similar to RNA-binding protein Luc7-like 2         | 86,06  | 54191  | 3 |
| 133 | IPI00025491 | EIF4A1 Eukaryotic initiation factor 4A-I                                        | 82,12  | 46125  | 3 |
| 134 | IPI00011200 | PHGDH D-3-phosphoglycerate dehydrogenase                                        | 81,46  | 56614  | 2 |
| 135 | IPI00003949 | UBE2N Ubiquitin-conjugating enzyme E2 N                                         | 76,53  | 17127  | 2 |
| 136 | IPI00003377 | SFRS7 Isoform 1 of Splicing factor, arginine/serine-rich 7                      | 76,36  | 27350  | 3 |
| 137 | IPI00216457 | HIST2H2AA4;HIST2H2AA3 Histone H2A type 2-A                                      | 63,95  | 14087  | 3 |
| 138 | IPI00012726 | PABPC4 Isoform 1 of Polyadenylate-binding protein 4                             | 59,75  | 70738  | 3 |
| 139 | IPI00444262 | NCL cDNA FLJ45706 fis, clone FEBRA2028457, highly similar to Nucleolin          | 56,89  | 65922  | 3 |
| 140 | IPI00022434 | ALB Putative uncharacterized protein ALB                                        | 56,59  | 71658  | 3 |

|     |             |                                                                                   |        |        |   |
|-----|-------------|-----------------------------------------------------------------------------------|--------|--------|---|
| 141 | IPI00026302 | RPL31 60S ribosomal protein L31                                                   | 48,49  | 14454  | 3 |
| 142 | IPI00815732 | PAICS phosphoribosylaminoimidazole carboxylase, phosphoribosylaminoimidazole succ | 46,66  | 47928  | 3 |
| 143 | IPI00217468 | HIST1H1B Histone H1.5                                                             | 43,06  | 22566  | 3 |
| 144 | IPI00021266 | SNORD4A;RPL23A 60S ribosomal protein L23a                                         | 41,86  | 17684  | 3 |
| 145 | IPI00220301 | PRDX6 Peroxiredoxin-6                                                             | 40,88  | 25019  | 3 |
| 146 | IPI00306516 | TIMM44 Mitochondrial import inner membrane translocase subunit TIM44              | 40,2   | 51323  | 3 |
| 147 | IPI00470610 | PYCR2 Pyrroline-5-carboxylate reductase 2                                         | 101,99 | 33616  | 2 |
| 148 | IPI00180954 | CIRBP Cold-inducible RNA-binding protein                                          | 76,56  | 18637  | 2 |
| 149 | IPI00010153 | RPL23 60S ribosomal protein L23                                                   | 69,47  | 14856  | 2 |
| 150 | IPI00219217 | LDHB L-lactate dehydrogenase B chain                                              | 64,98  | 36615  | 2 |
| 151 | IPI00216049 | HNRNPK;MIR7-1 Isoform 1 of Heterogeneous nuclear ribonucleoprotein K              | 59,4   | 50944  | 2 |
| 152 | IPI00465028 | TPI1;TPI1P1 triosephosphate isomerase 1 isoform 2                                 | 59,33  | 30772  | 2 |
| 153 | IPI00025753 | DSG1 Desmoglein-1                                                                 | 56,92  | 113676 | 2 |
| 154 | IPI00003923 | UMPS Isoform 1 of Uridine 5'-monophosphate synthase                               | 56,5   | 52189  | 2 |
| 155 | IPI00016342 | RAB7A Ras-related protein Rab-7a                                                  | 52,26  | 23475  | 2 |
| 156 | IPI00216744 | DCX Isoform 1 of Neuronal migration protein doublecortin                          | 51,97  | 49816  | 2 |
| 157 | IPI00012074 | HNRNPR Isoform 1 of Heterogeneous nuclear ribonucleoprotein R                     | 50,49  | 70899  | 2 |
| 158 | IPI00427330 | SBDS Ribosome maturation protein SBDS                                             | 49,81  | 28745  | 2 |
| 159 | IPI00299571 | PDIA6 Isoform 2 of Protein disulfide-isomerase A6                                 | 49,47  | 53867  | 2 |
| 160 | IPI00015954 | SAR1A GTP-binding protein SAR1a                                                   | 47,17  | 22353  | 2 |
| 161 | IPI00219757 | GSTP1 Glutathione S-transferase P                                                 | 46,91  | 23341  | 2 |
| 162 | IPI00787945 | LOC729774 hypothetical protein, partial                                           | 45,6   | 14072  | 2 |
| 163 | IPI00022974 | PIP Prolactin-inducible protein                                                   | 43,28  | 16562  | 2 |
| 164 | IPI00176469 | CABC1 Isoform 1 of Chaperone activity of bc1 complex-like, mitochondrial          | 43,2   | 71904  | 2 |
| 165 | IPI00797126 | NACA nascent polypeptide-associated complex subunit alpha isoform a               | 43,14  | 94622  | 2 |
| 166 | IPI00016610 | PCBP1 Poly(rC)-binding protein 1                                                  | 42,88  | 37474  | 2 |
| 167 | IPI00646304 | PPIB Peptidyl-prolyl cis-trans isomerase B                                        | 42,66  | 23728  | 2 |
| 168 | IPI00783097 | GARS Glycyl-tRNA synthetase                                                       | 38,17  | 83087  | 2 |
| 169 | IPI00003856 | ATP6V1E1 V-type proton ATPase subunit E 1                                         | 61,82  | 26129  | 1 |
| 170 | IPI00549972 | LIMD2 LIM domain-containing protein 2                                             | 61,35  | 14061  | 1 |
| 171 | IPI00011631 | ZW10 Centromere/kinetochore protein zw10 homolog                                  | 59,59  | 88773  | 1 |
| 172 | IPI00217661 | RAVER1 ribonucleoprotein PTB-binding 1                                            | 58,69  | 79529  | 1 |
| 173 | IPI00013396 | SNRPC U1 small nuclear ribonucleoprotein C                                        | 57,85  | 17381  | 1 |
| 174 | IPI00027547 | DCD Dermcidin                                                                     | 55,01  | 11277  | 1 |
| 175 | IPI00411680 | PCMT1 Isoform 1 of Protein-L-isoaspartate(D-aspartate) O-methyltransferase        | 52,04  | 24635  | 1 |
| 176 | IPI00856049 | RPL22L1 60S ribosomal protein L22-like 1                                          | 48,01  | 14598  | 1 |

|     |             |                                                                    |       |        |   |
|-----|-------------|--------------------------------------------------------------------|-------|--------|---|
| 177 | IPI00029631 | ERH Enhancer of rudimentary homolog                                | 47,99 | 12251  | 1 |
| 178 | IPI00006050 | FAM115A Isoform 1 of Protein FAM115A                               | 45,77 | 102061 | 1 |
| 179 | IPI00376503 | PYCR1 pyrroline-5-carboxylate reductase 1, mitochondrial isoform 2 | 44,66 | 33320  | 1 |

---
